# Supplementary material for: Supported C60-IL-PdNPs as extremely active nanocatalysts for C–C cross-coupling reactions
Source: Royal Society of Chemistry journal article supplement (doi:10.1039/c6ta07599a), 2016-01-01

## SUPPORTING INFORMATION

# Supported C<sub>60</sub>-IL-PdNP as extremely active nanocatalysts for C–C cross coupling reactions

*Francesco Giacalone,<sup>a,\*</sup> Vincenzo Campisciano,<sup>a</sup> Carla Calabrese,<sup>a,b</sup> Valeria La Parola,<sup>c</sup>*

*Leonarda F. Liotta,<sup>c</sup> Carmela Aprile,<sup>b</sup> Michelangelo Gruttadauria<sup>a,\*</sup>*

<sup>a</sup> Dipartimento Scienze e Tecnologie Biologiche, Chimiche e Farmaceutiche (STEBICEF),  
Università degli Studi di Palermo, Viale delle Scienze, Ed. 17, 90128 Palermo (Italy).

Email: francesco.giacalone@unipa.it, Tel: +39 09123897530.

michelangelo.gruttadauria@unipa.it. Tel: +39 09123897534.

<sup>b</sup> Laboratory of Applied Material Chemistry (CMA), University of Namur, 61 rue de Bruxelles, 5000  
Namur (Belgium).

<sup>c</sup> Istituto per lo Studio dei Materiali Nanostrutturati ISMN-CNR, Via Ugo La Malfa 153, 90146-  
Palermo (Italy).

## Table of Contents

**Figure S1.** N<sub>2</sub>-adsorption/desorption isotherms and pore size distribution of amorphous silica and **4a**.

**Figure S2.** N<sub>2</sub>-adsorption/desorption isotherms and pore size distribution of SBA-15 and **4b**.

**Figure S3.** Experimental X-ray diffraction pattern of materials **5a-c** and simulated diffraction pattern of palladium and maghemite.

**Figure S4.** HR-TEM of **5a**.

**Table S1.** XPS Pd 3d<sub>5/2</sub> binding energies (eV), Pd/Si, Pd/C, N/Si and N/C surface atomic ratios.

**Figure S5.** Solid-state <sup>13</sup>C NMR of materials **4a** and **5a**.

**Table S2.** Screening of reaction conditions and dependence of reaction yield in function of the temperature in the reaction between 4-iodoanisole and methylacrylate.

**Figure S6.** Recycling tests of catalysts **5b** and **5c** in the Suzuki reaction.

**Figure S7.** High-resolution XPS of Pd3d region of fresh and reused **5a**.

**List of <sup>1</sup>H NMR spectral data of pure known compounds ..... S7 – S8**

**<sup>1</sup>H NMR spectra of pure known compounds and those of partially converted mixtures of Heck and Suzuki reactions ..... S9 – S19**

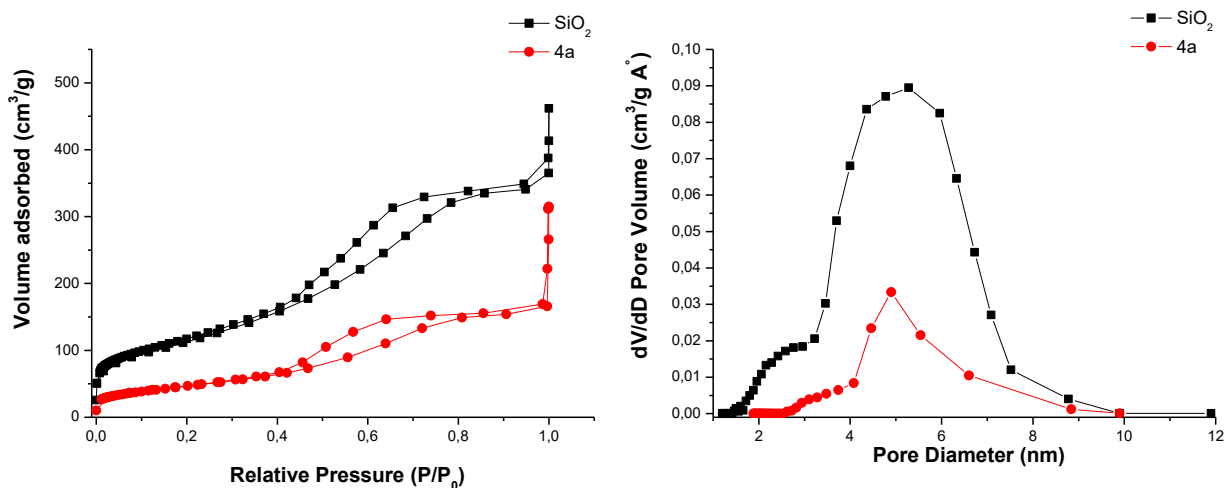

Figure S1. N<sub>2</sub>-adsorption/desorption isotherms and pore size distribution of amorphous silica and 4a.

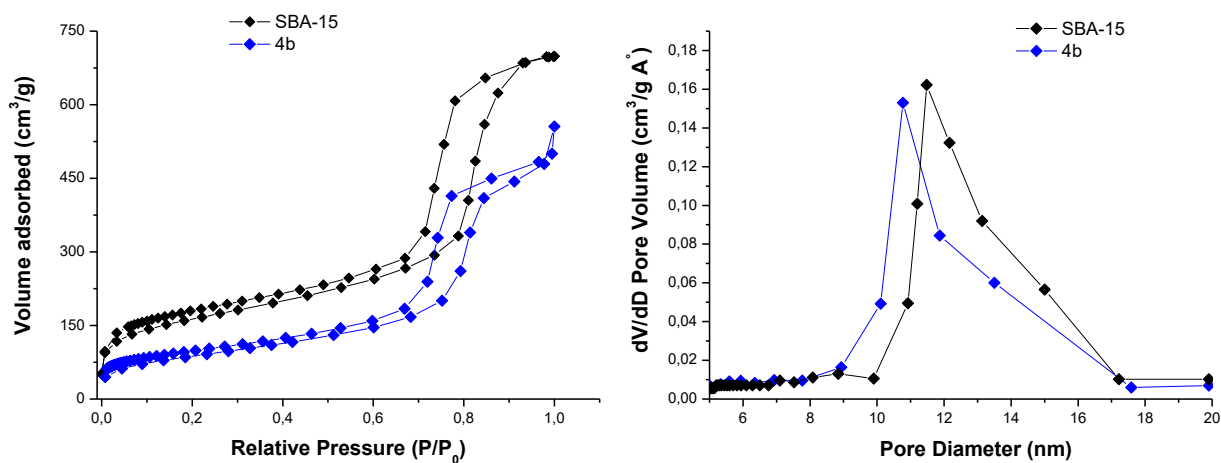

Figure S2. N<sub>2</sub>-adsorption/desorption isotherms and pore size distribution of SBA-15 and 4b.

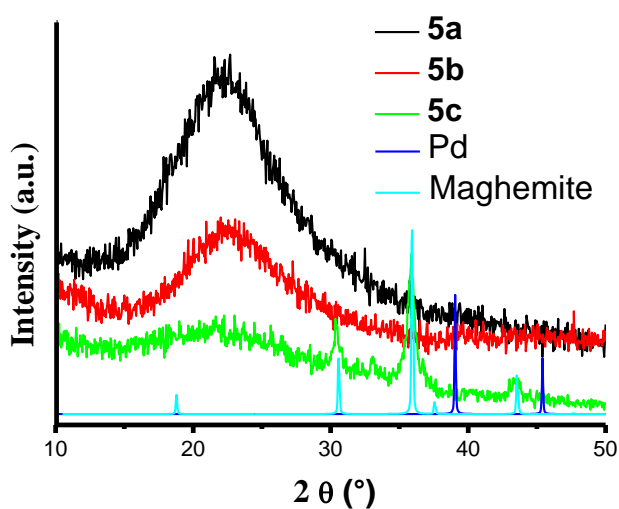

Figure S3. Experimental X-ray diffraction pattern of materials 5a-c and simulated diffraction pattern of palladium and maghemite.

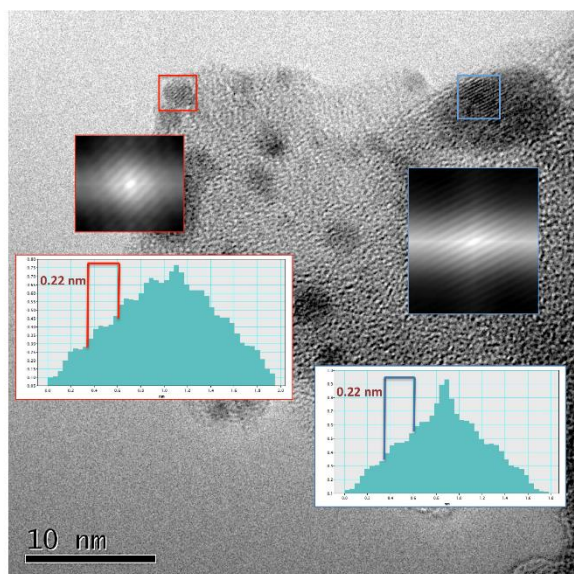

**Figure S4.** HR-TEM of **5a**. Fast Fourier transform (FFT) patterns and autocorrelation profiles are reported in the red and blue squares.

**Table S1.** XPS Pd 3d<sub>5/2</sub> binding energies (eV), Pd/Si, Pd/C, N/Si and N/C surface atomic ratios. The relative percentages are given in parentheses.

| Material  | Pd 3d <sub>5/2</sub> | Pd/Si | Pd/C  | N/Si | N/C  |
|-----------|----------------------|-------|-------|------|------|
| <b>5a</b> | 334.9 (42)           | 0.025 | 0.010 | 0.11 | 0.04 |
|           | 336.9 (58)           |       |       |      |      |
| <b>5b</b> | 334.9 (46)           | 0.024 | 0.008 | 0.08 | 0.03 |
|           | 337 (54)             |       |       |      |      |
| <b>5c</b> | 335.3 (37)           | 0.094 | 0.005 | 0.52 | 0.03 |
|           | 337.6(63)            |       |       |      |      |

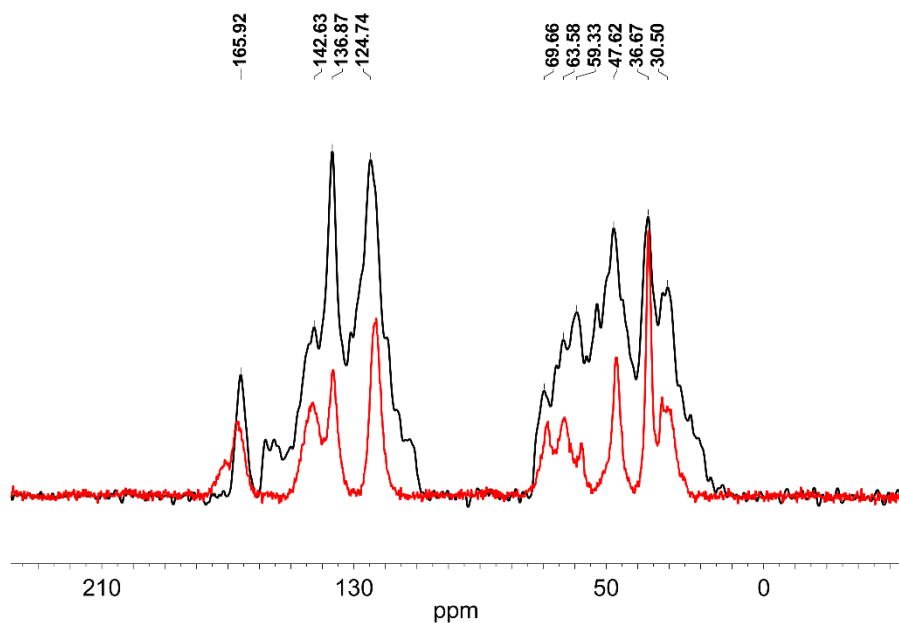

**Figure S5.** Solid-state  $^{13}\text{C}$  NMR of materials **4a** (red) and **5a** (black).

**Table S2.** Screening of reaction conditions and dependence of reaction yield in function of the temperature in the reaction between 4-iodoanisole and methylacrylate.

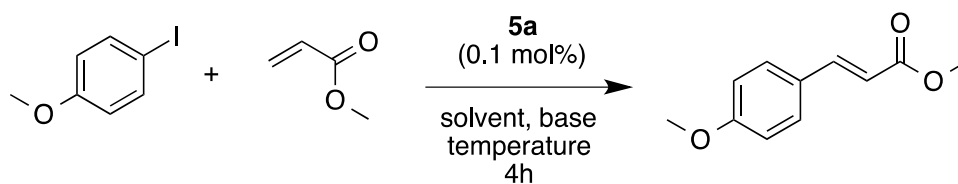

| Entry | Solvent                     | Base                           | Temperature / °C | Yield <sup>b</sup> % |
|-------|-----------------------------|--------------------------------|------------------|----------------------|
| 1     | Toluene                     | NEt <sub>3</sub>               | 100              | 22                   |
| 2     | Acetonitrile                | NEt <sub>3</sub>               | 100              | 82                   |
| 3     | H <sub>2</sub> O/EtOH (1:3) | K <sub>2</sub> CO <sub>3</sub> | 100              | 31                   |
| 4     | DMF                         | NEt <sub>3</sub>               | 120              | >99                  |
| 5     | DMF                         | NEt <sub>3</sub>               | 90               | 85                   |
| 6     | DMF                         | NEt <sub>3</sub>               | 60               | 0                    |

<sup>a</sup> Reaction conditions: methyl acrylate (0.75 mmol), 4-iodoanisole (0.5 mmol), base (1 mmol), solvent (1 mL), catalyst (0.1 mol%, 2.5 mg). <sup>b</sup> After purification.

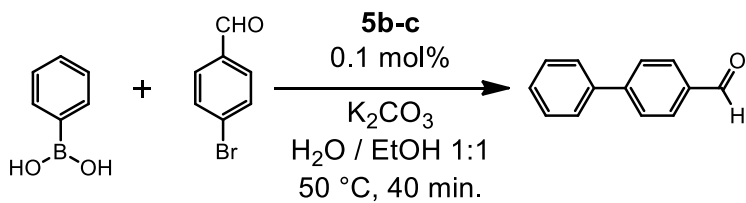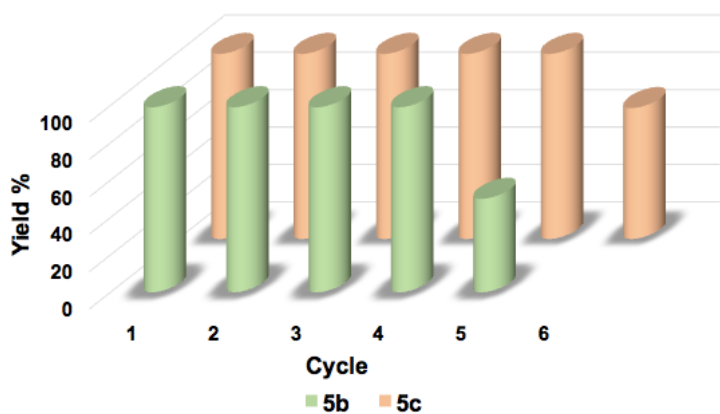

**Figure S6.** Recycling tests of catalysts **5b** and **5c** in the Suzuki reaction.

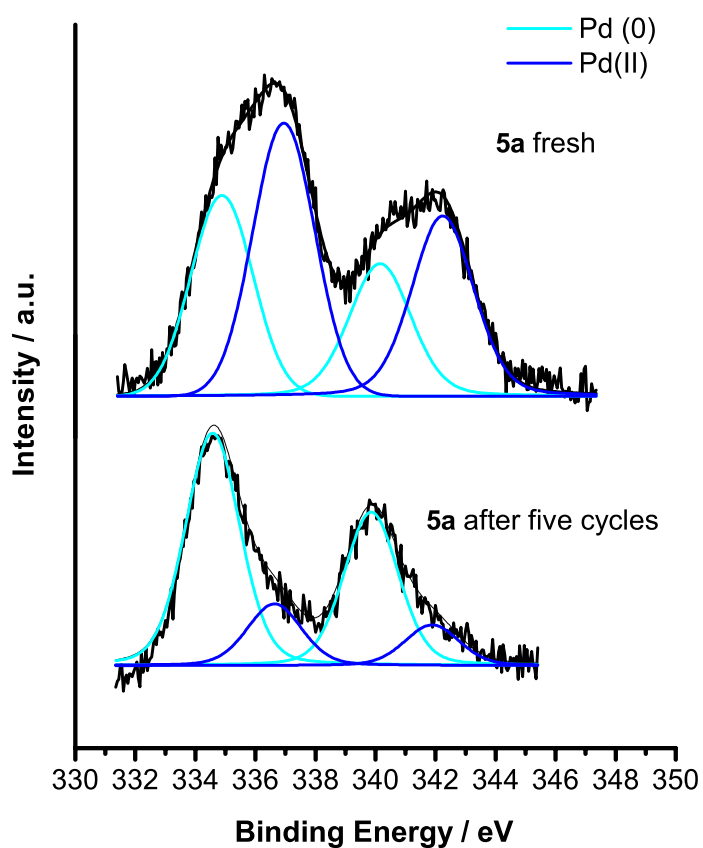

**Figure S7.** High-resolution XPS of Pd3d region of fresh **5a** (up) and reused **5a** for five times (bottom).

## List of $^1\text{H}$ NMR spectral data of pure known compounds:

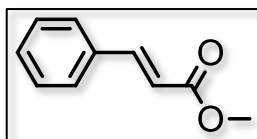

**(E)-Methyl Cinnamate;**  $^1\text{H}$  NMR ( $\text{CDCl}_3$ , 300 MHz):  $\delta$  7.71 (d, 1H,  $J = 16.0$  Hz), 7.55–7.52 (m, 2H), 7.40–7.38 (m, 3H), 6.45 (d, 1H,  $J = 16.0$  Hz), 3.82 (s, 3H).

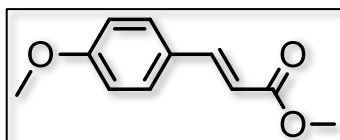

**(E)-Methyl-4-methoxycinnamate;**  $^1\text{H}$  NMR ( $\text{CDCl}_3$ , 300 MHz):  $\delta$  7.66 (d, 1H,  $J = 16.0$  Hz), 7.49 (d, 2H,  $J = 8.7$  Hz), 6.91 (d, 2H,  $J = 8.7$  Hz), 6.32 (d, 1H,  $J = 16.0$  Hz), 3.85 (s, 3H), 3.80 (s, 3H).

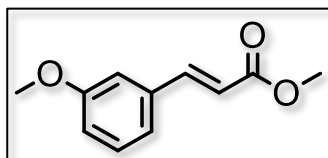

**(E)-Methyl 3-methoxycinnamate;**  $^1\text{H}$  NMR ( $\text{CDCl}_3$ , 300 MHz):  $\delta$  7.66 (d, 1H,  $J = 16.0$  Hz), 7.32–7.27 (m, 1H), 7.12–7.10 (m, 1H), 7.03–7.04 (m, 1H), 6.95–6.92 (m, 1H), 6.43 (d, 1H,  $J = 16.0$  Hz), 3.82 (s, 3H) 3.80 (s, 3H).

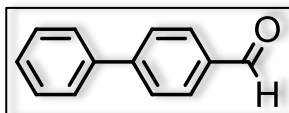

**4-Formylbiphenyl;**  $^1\text{H}$  NMR (300 MHz,  $\text{CDCl}_3$ , ppm):  $\delta$  10.08 (s, 1H), 7.97 (d, 2H,  $J = 7.7$  Hz), 7.77 (d, 2H,  $J = 7.7$  Hz), 7.66 (d, 2H,  $J = 7.5$  Hz), 7.52–7.43 (m, 3H).

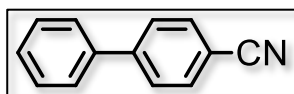

**4-Cyanobiphenyl;**  $^1\text{H}$  NMR (300 MHz,  $\text{CDCl}_3$ , ppm):  $\delta$  7.76–7.68 (m, 4H), 7.62–7.59 (m, 2H), 7.51–7.42 (m, 3H).

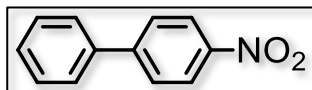

**4-Nitrobiphenyl;**  $^1\text{H}$  NMR (300 MHz,  $\text{CDCl}_3$ , ppm):  $\delta$  8.32 (d, 2H,  $J = 8.7$  Hz), 7.76 (d, 2H,  $J = 8.7$  Hz), 7.64 (d, 2H,  $J = 6.7$  Hz), 7.54–7.46 (m, 3H).

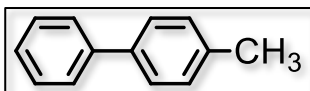

**4-Methylbiphenyl;** <sup>1</sup>H NMR (300 MHz, CDCl<sub>3</sub>, ppm): δ 7.60 (d, 2H, *J* = 7.3 Hz), 7.54–7.42 (m, 4H), 7.37–7.34 (m, 1H), 7.28 (d, 2H, *J* = 7.9 Hz), 2.42 (s, 3H).

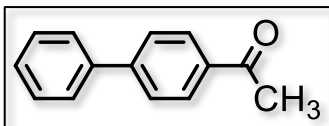

**4-Acetylbiphenyl;** <sup>1</sup>H NMR (300 MHz, CDCl<sub>3</sub>, ppm): δ 8.05 (d, 2H, *J* = 8.4 Hz), 7.71–7.63 (m, 4H), 7.51–7.40 (m, 3H), 2.65 (s, 3H).



**<sup>1</sup>H NMR spectra of pure known compounds and those of partially converted mixtures of Heck and Suzuki reactions:**

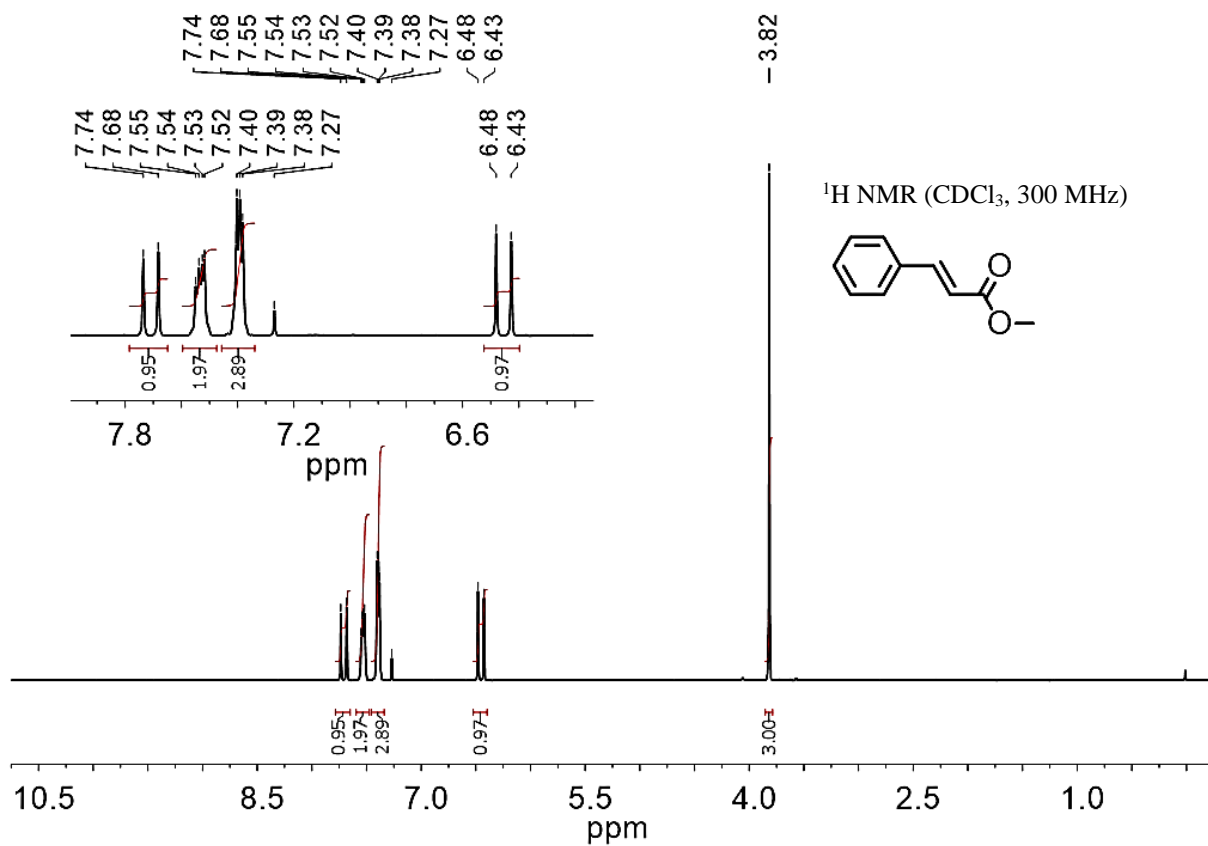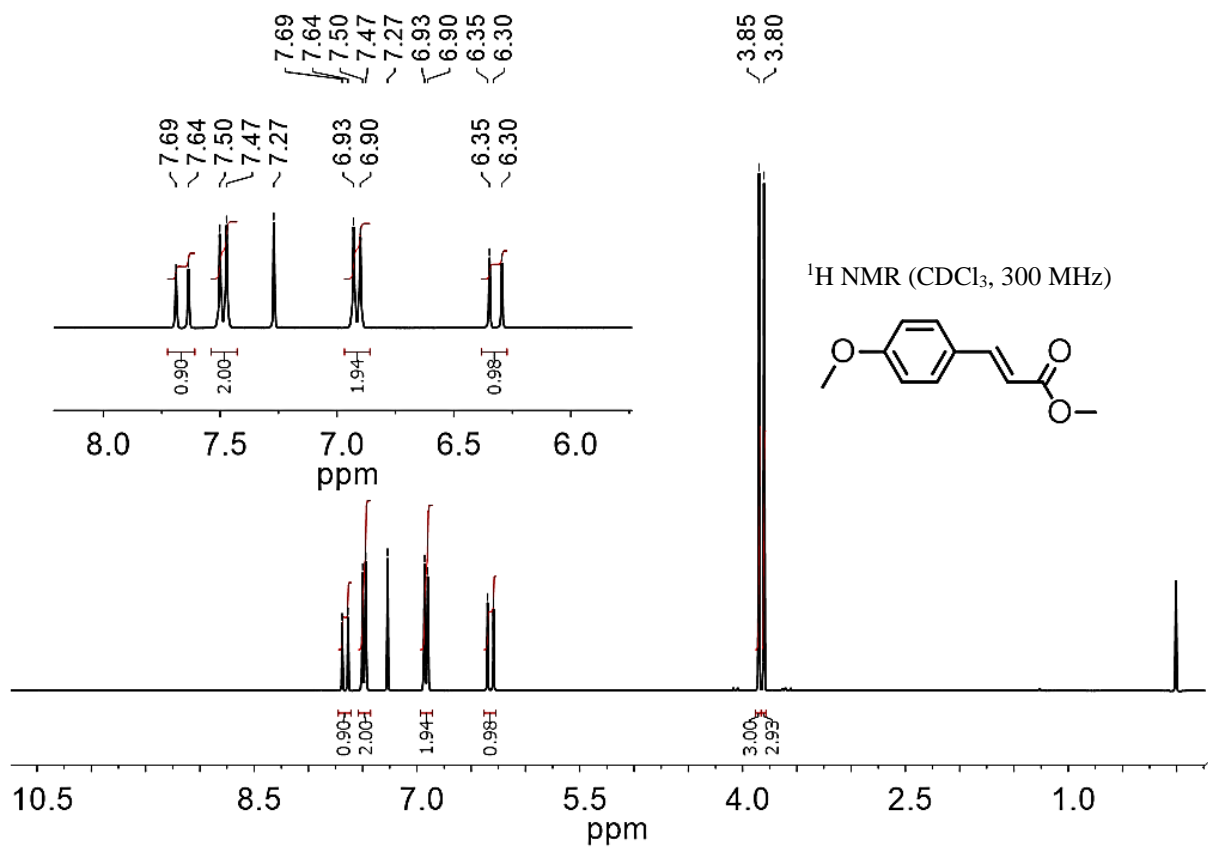

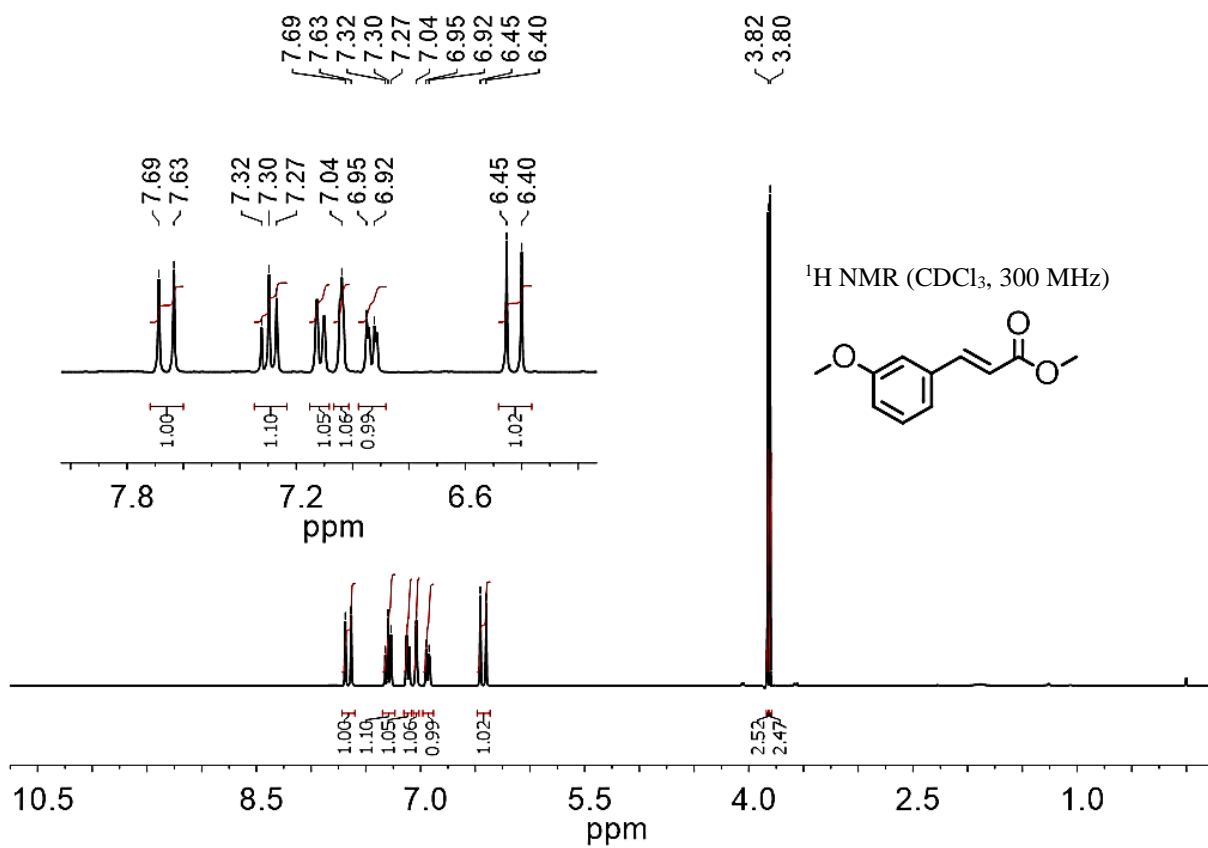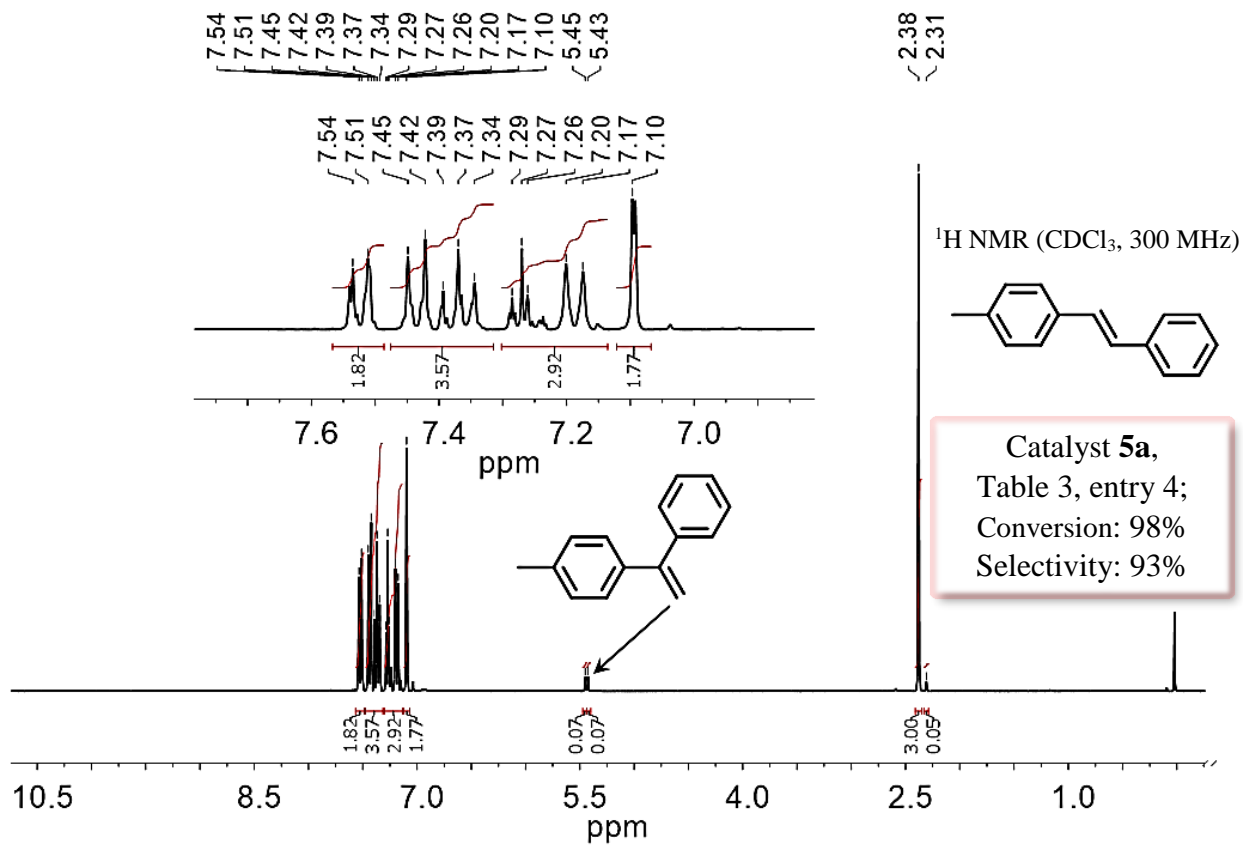

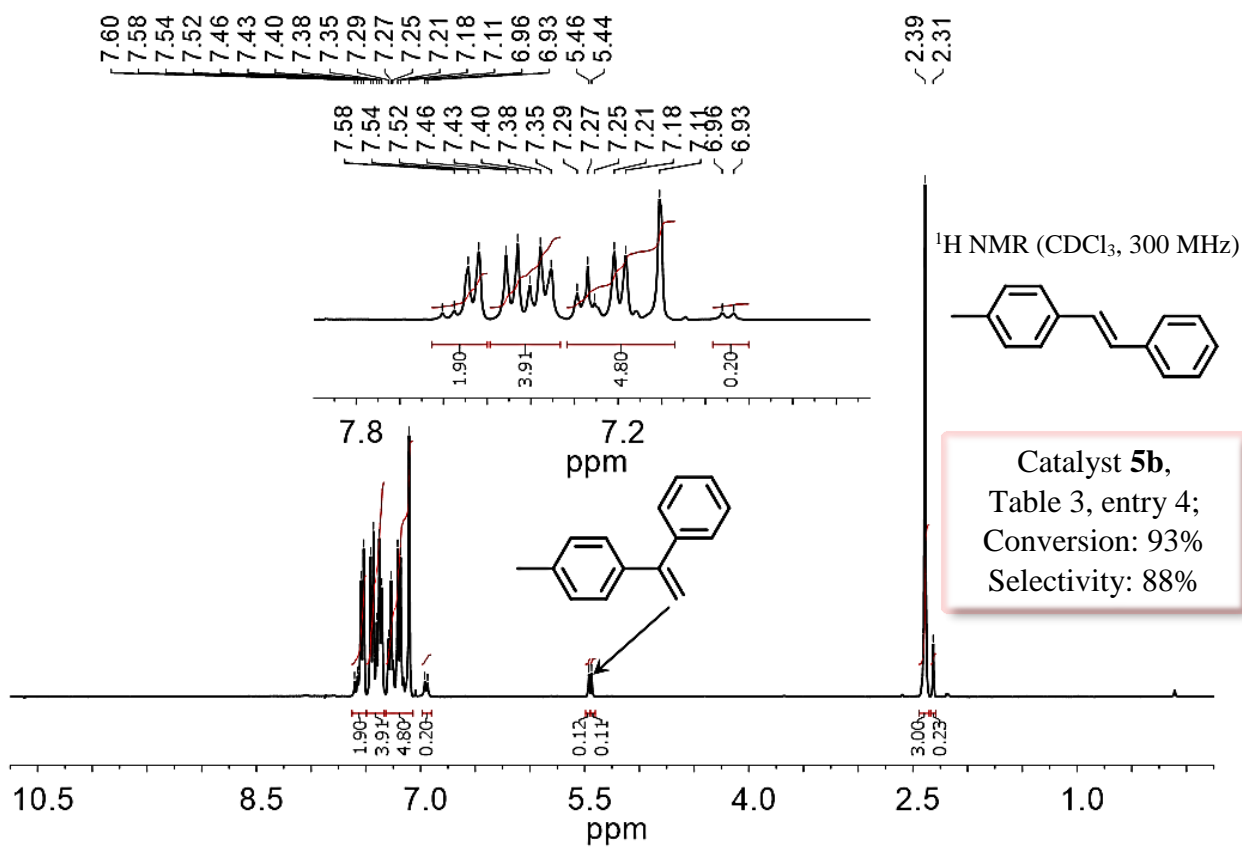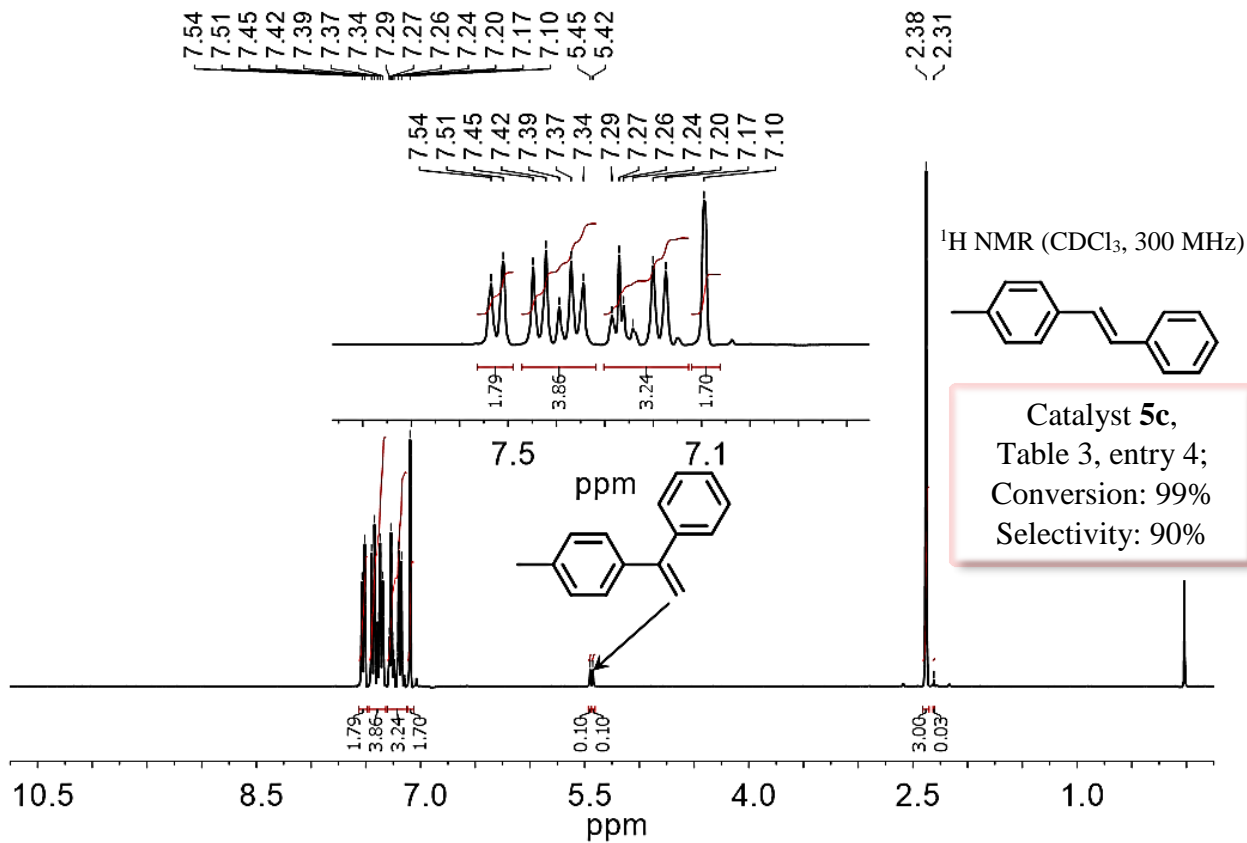

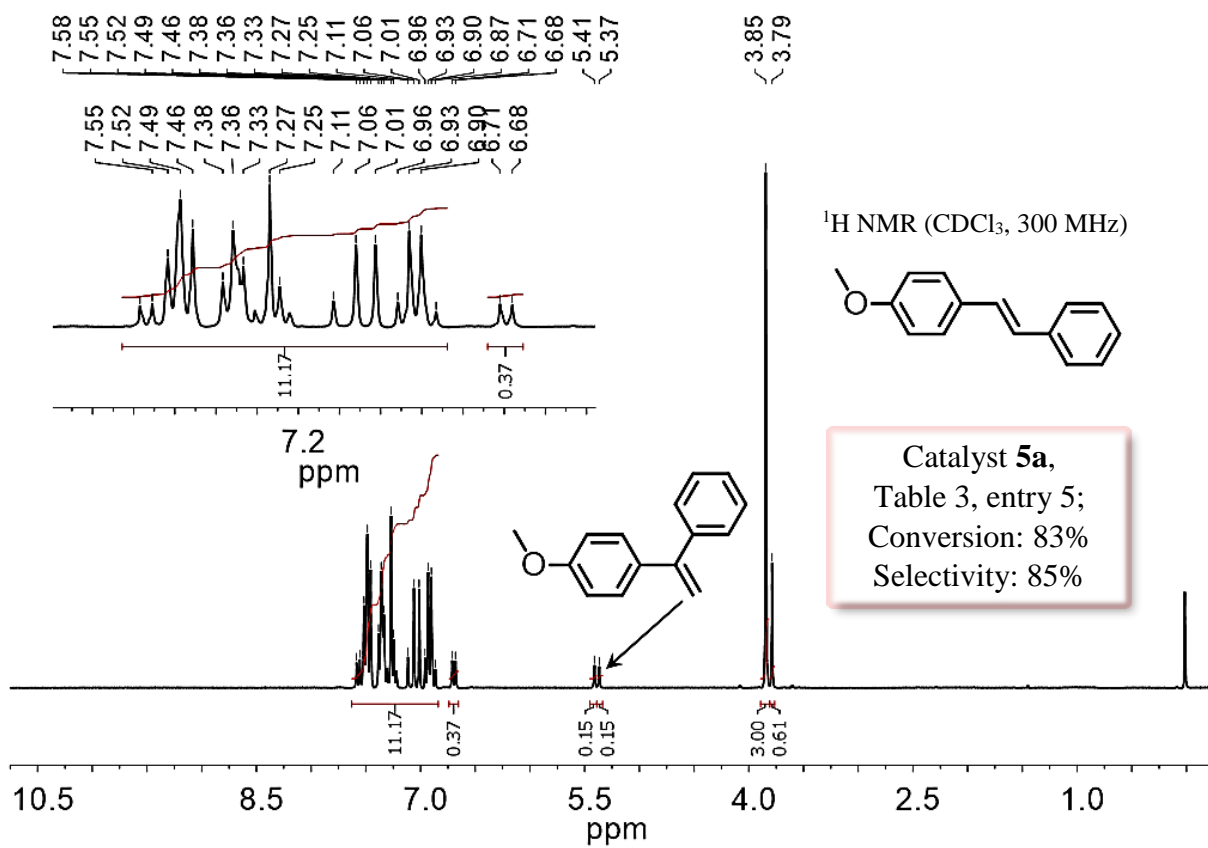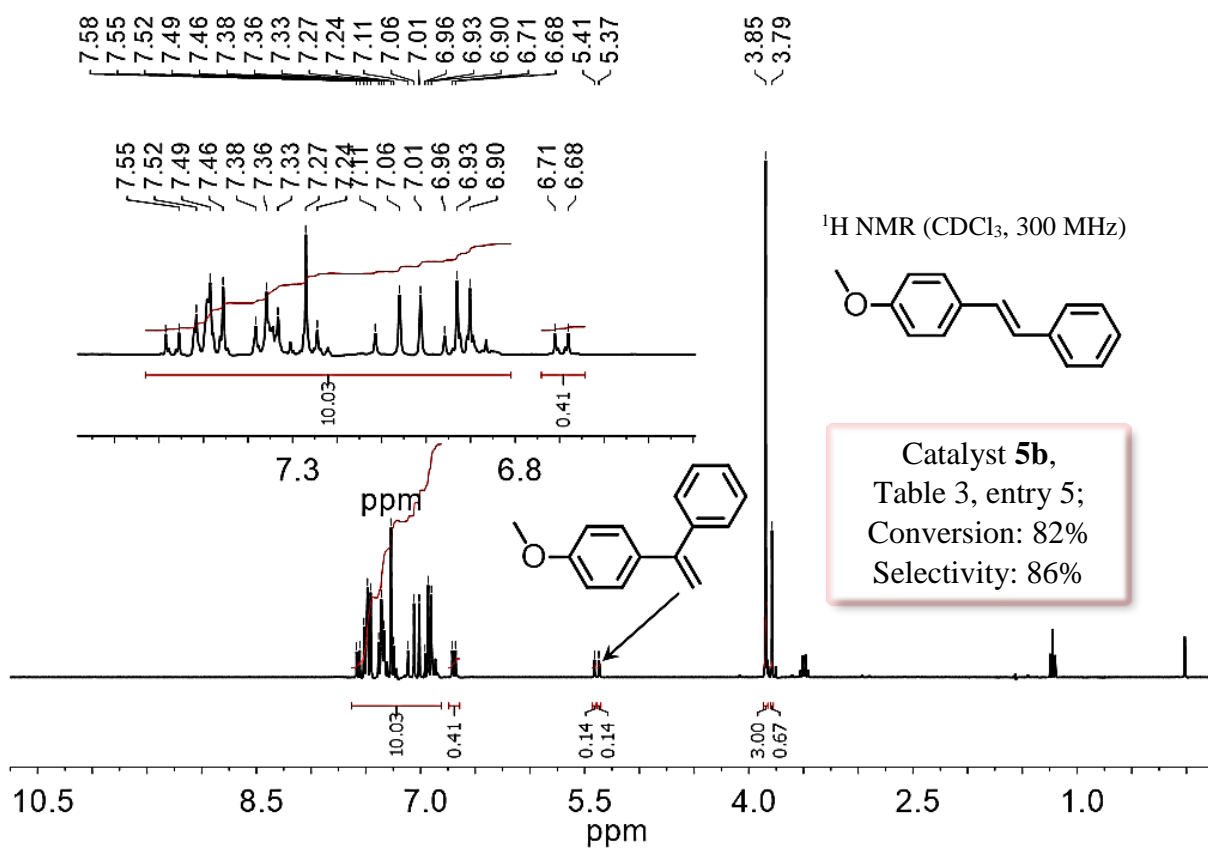

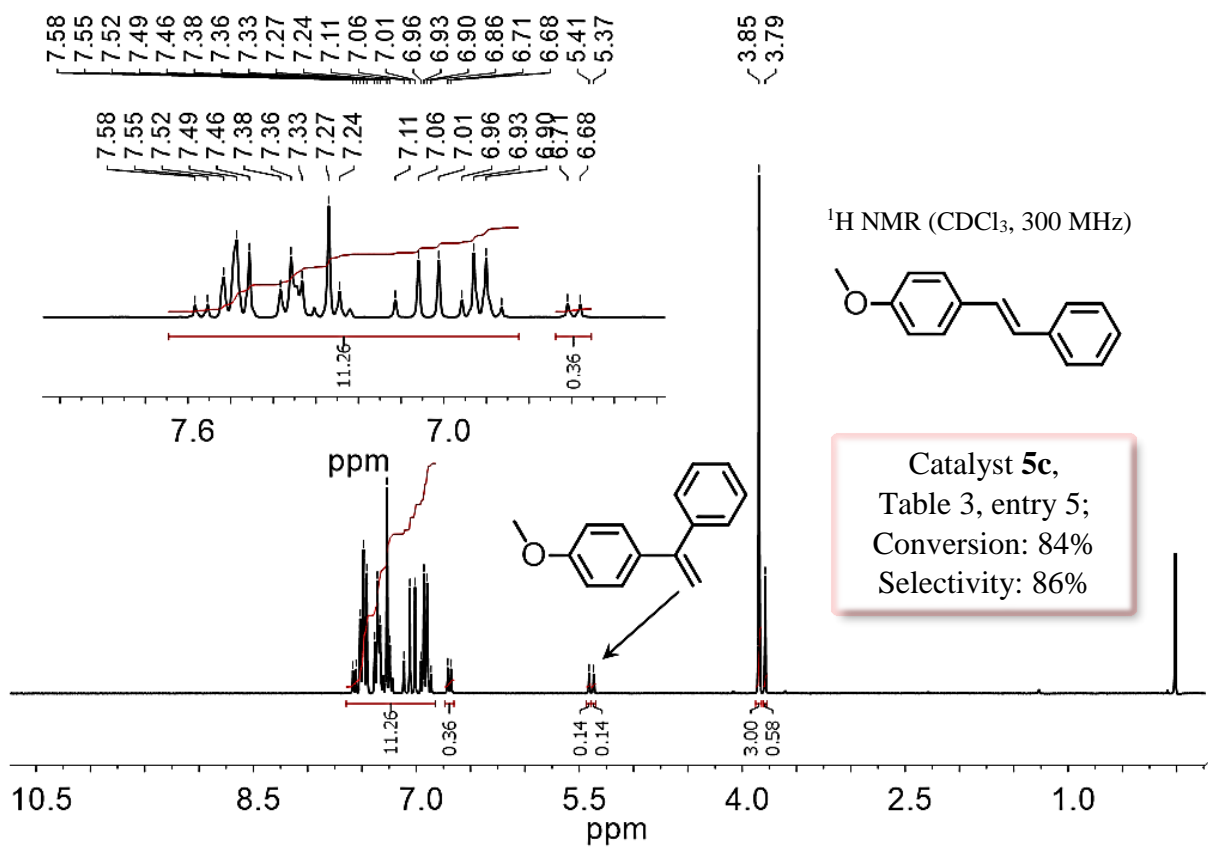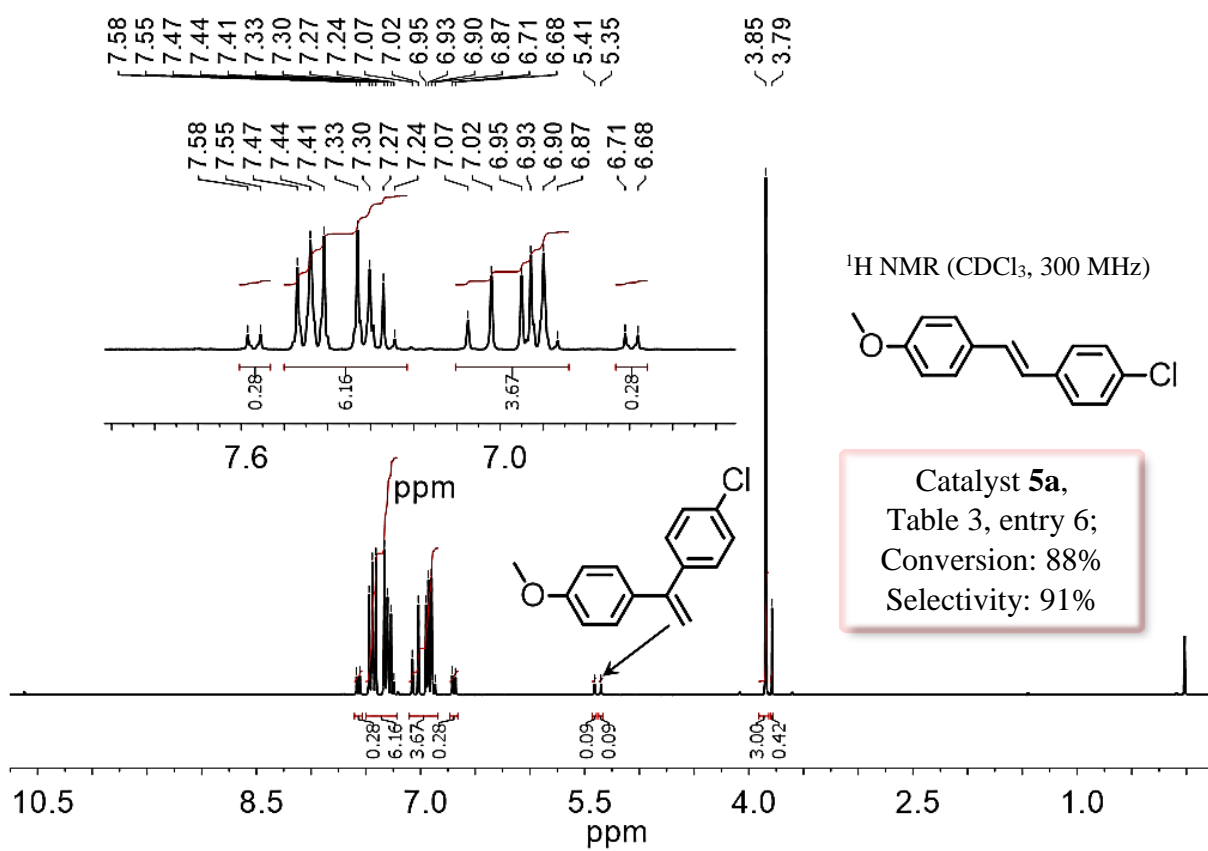

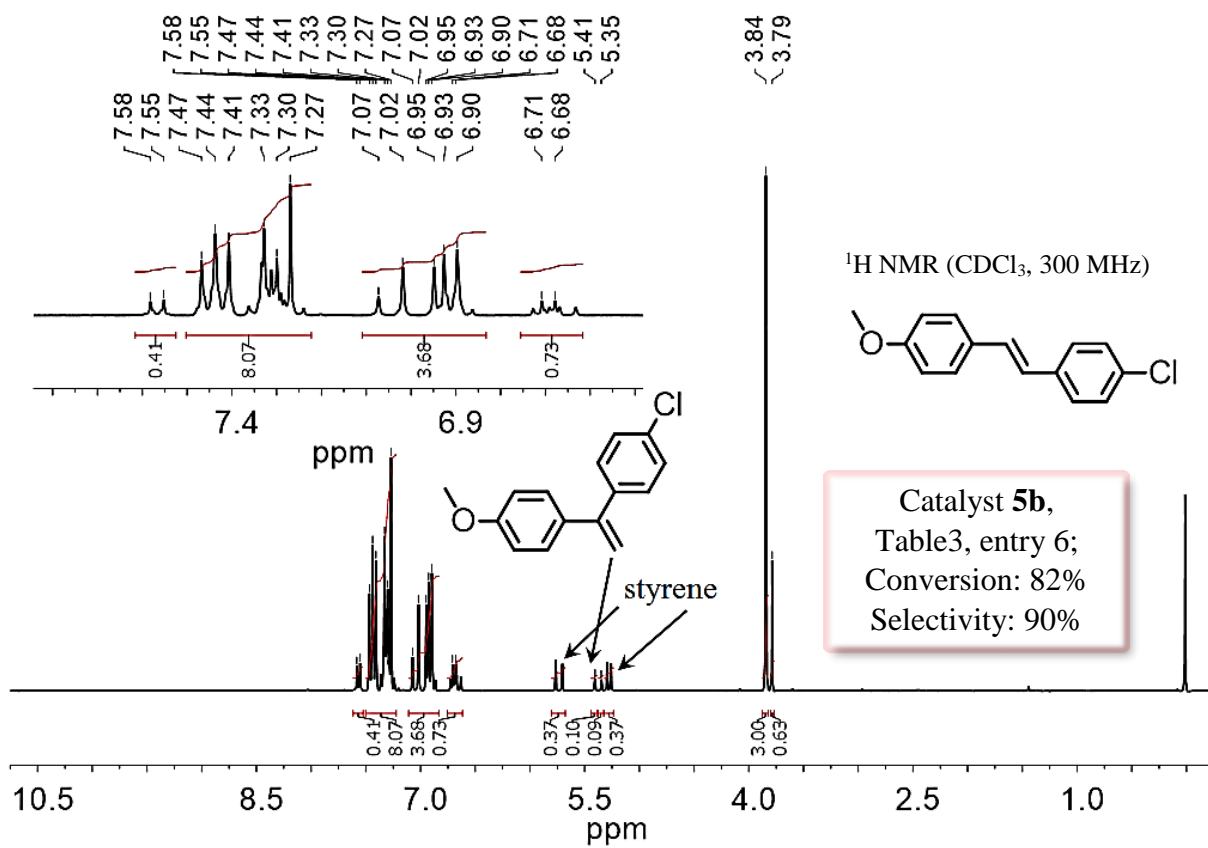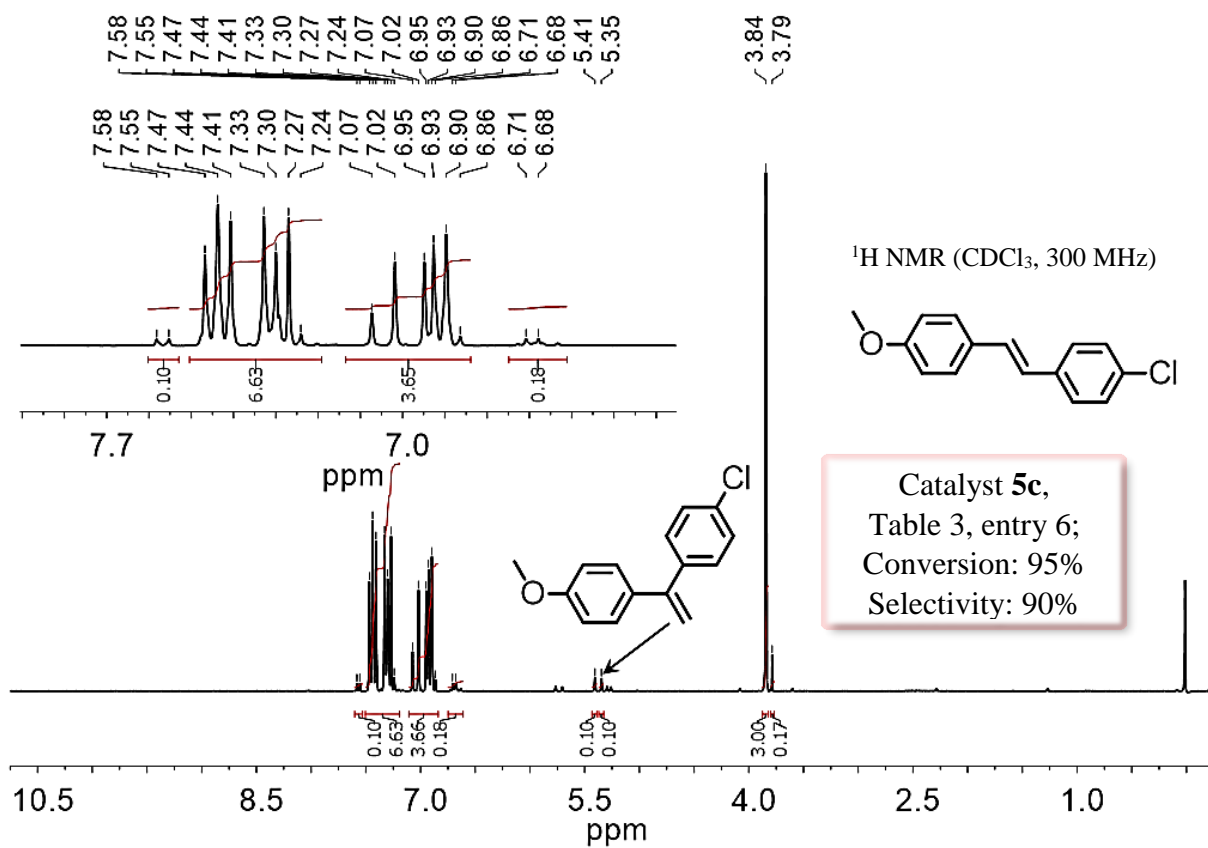

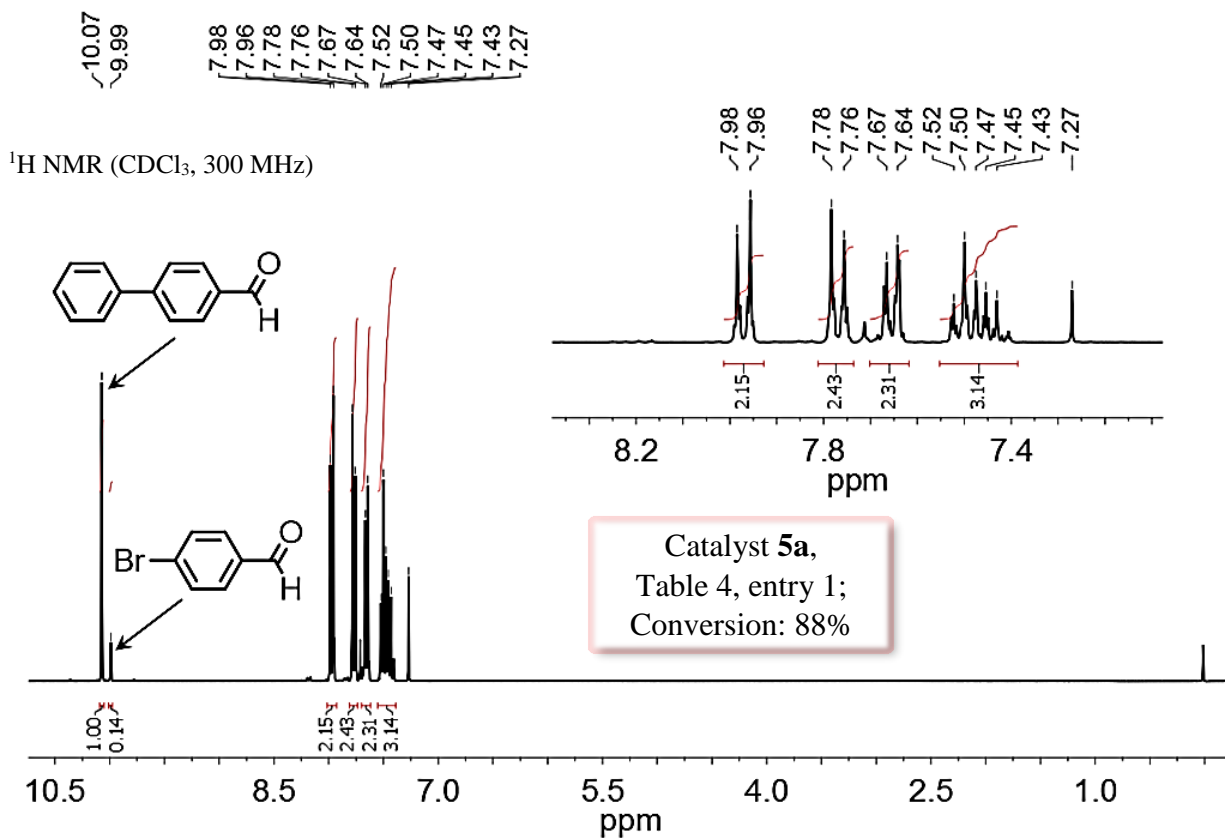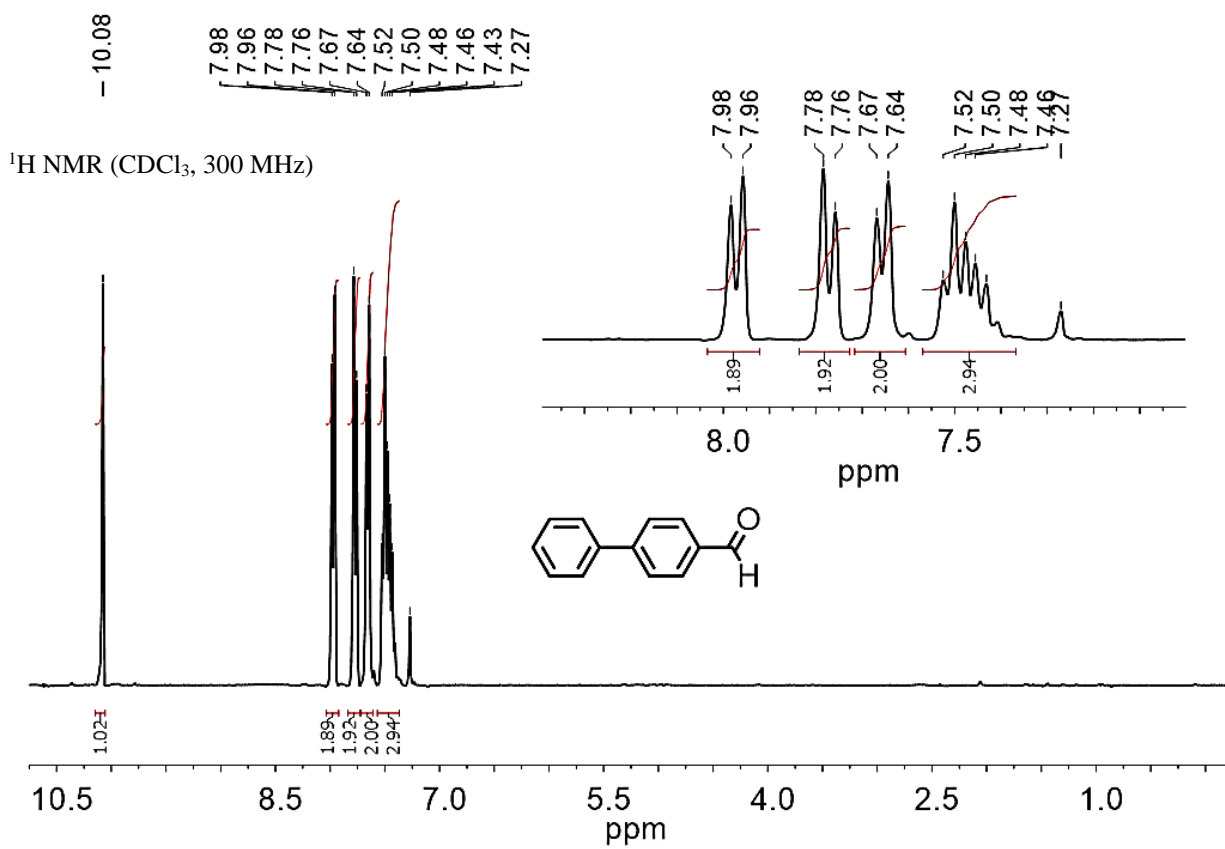

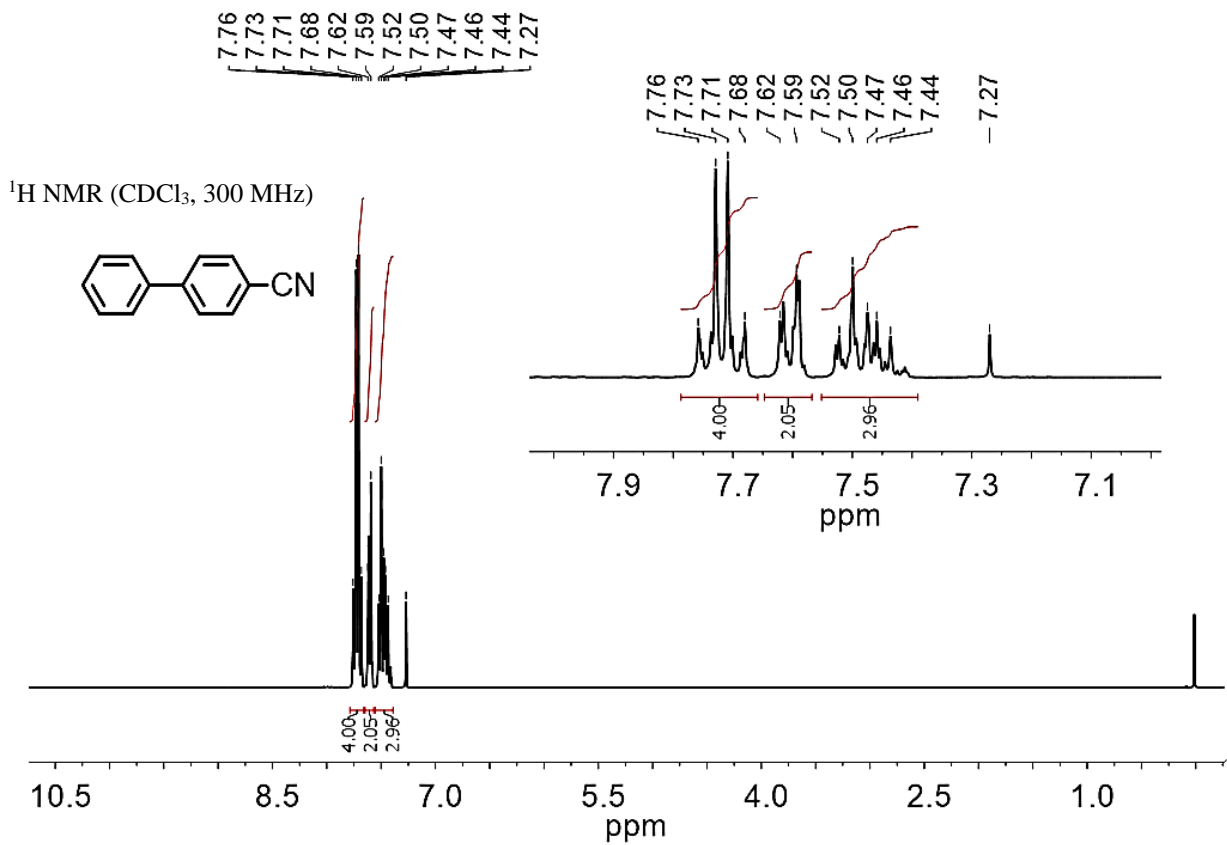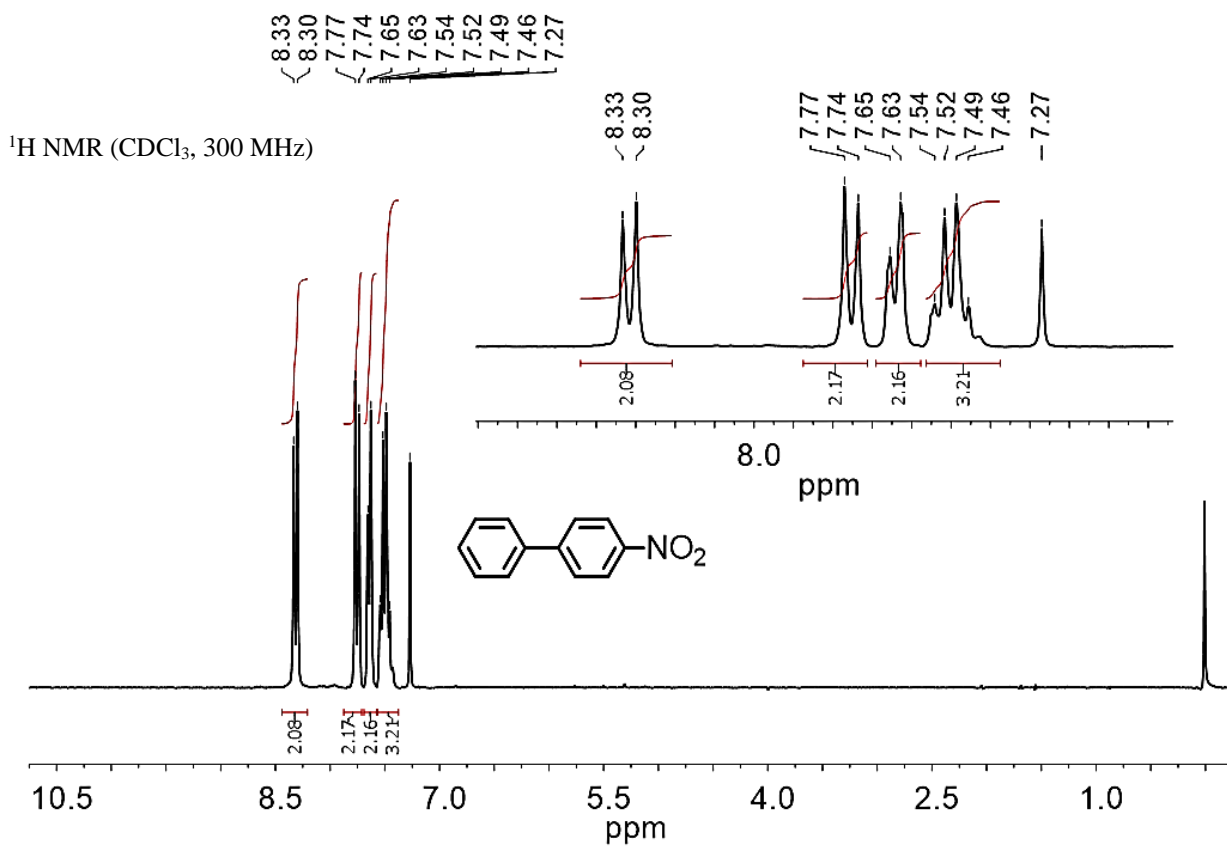



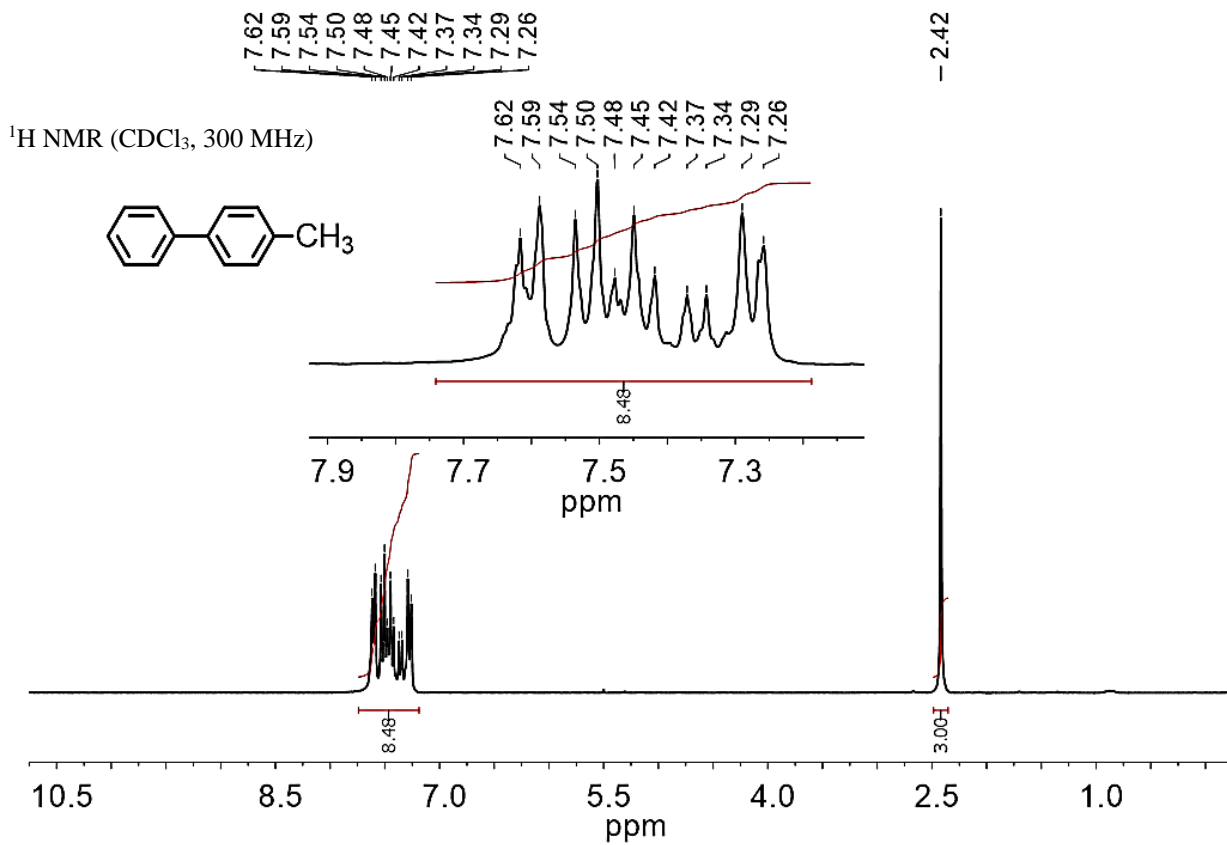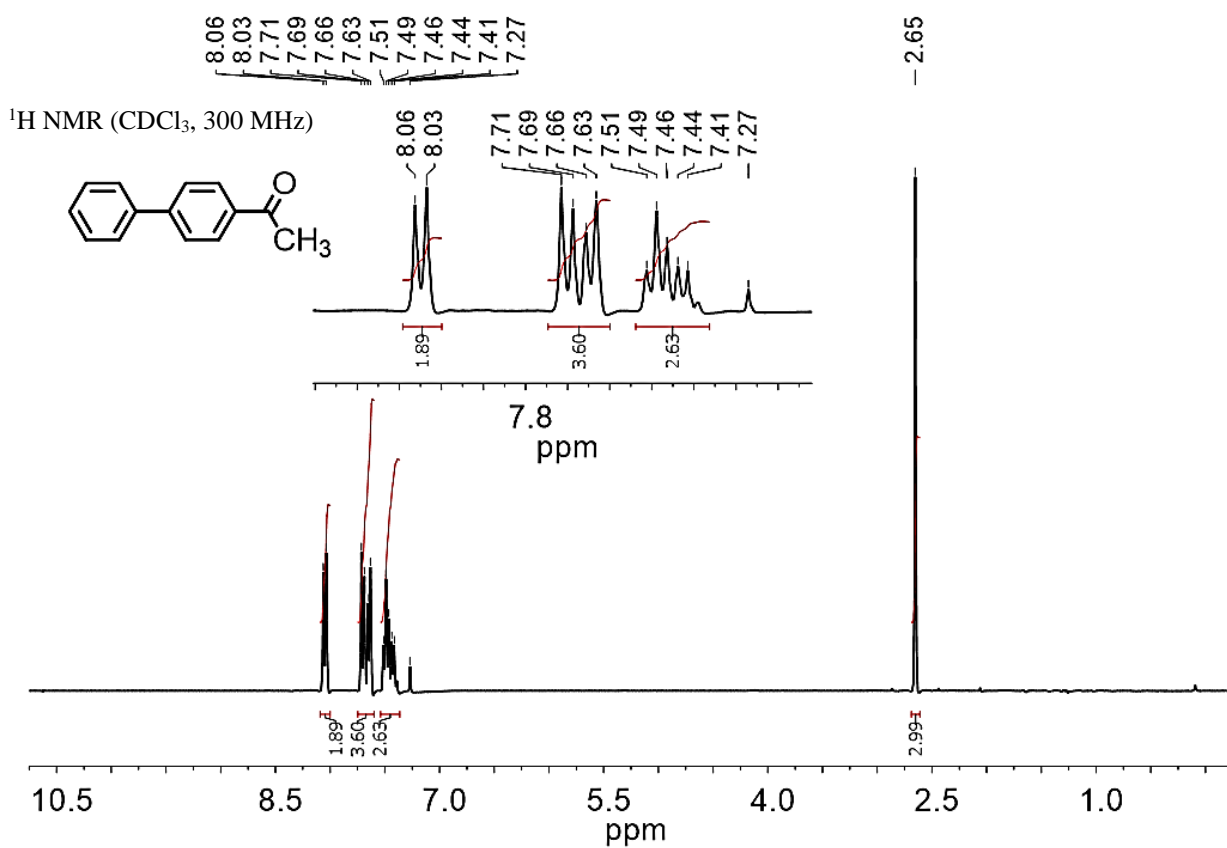

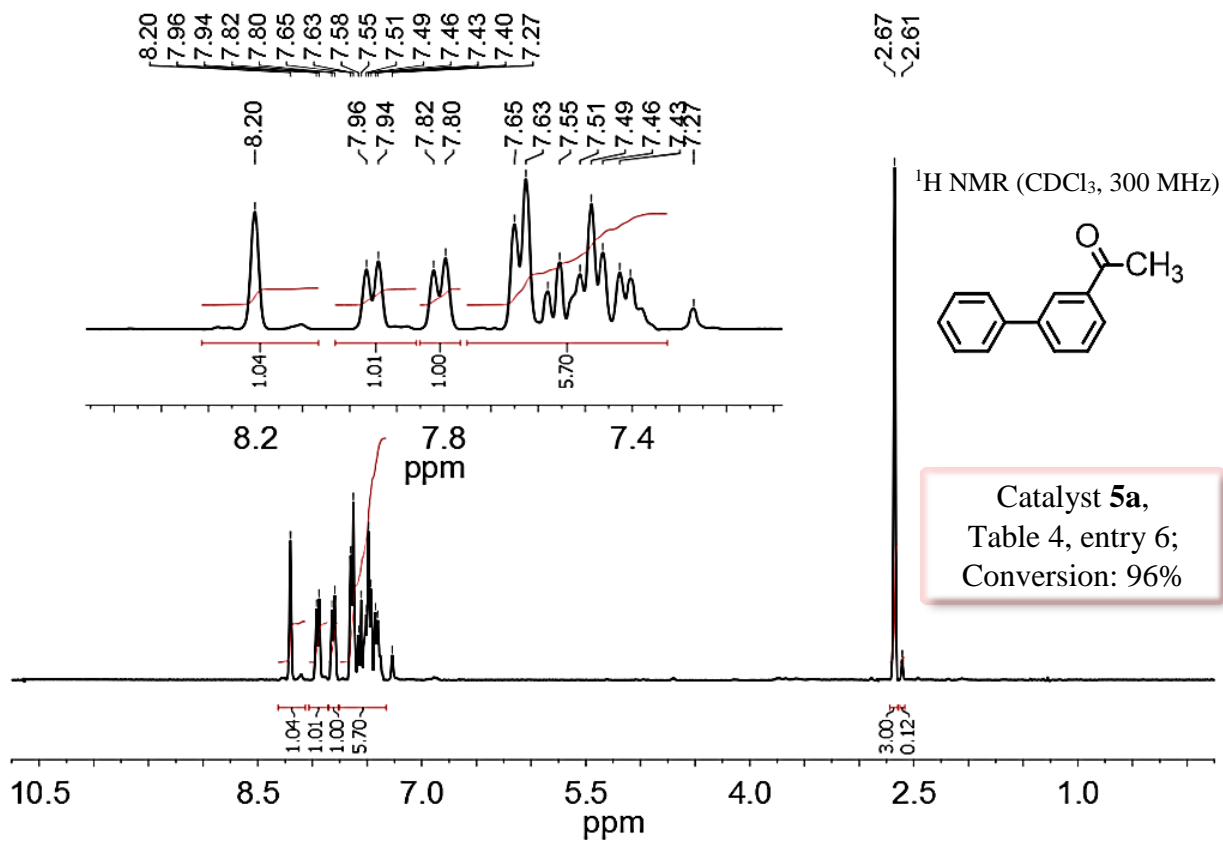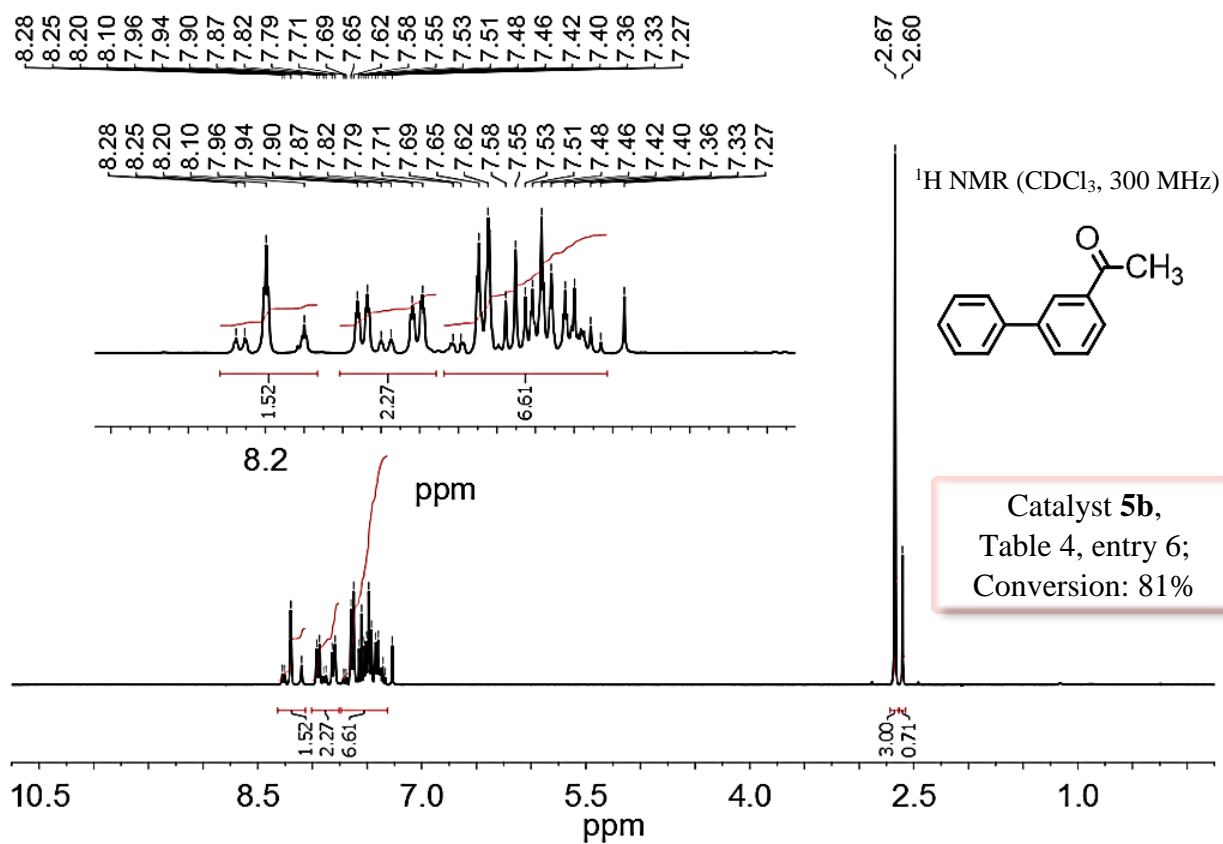

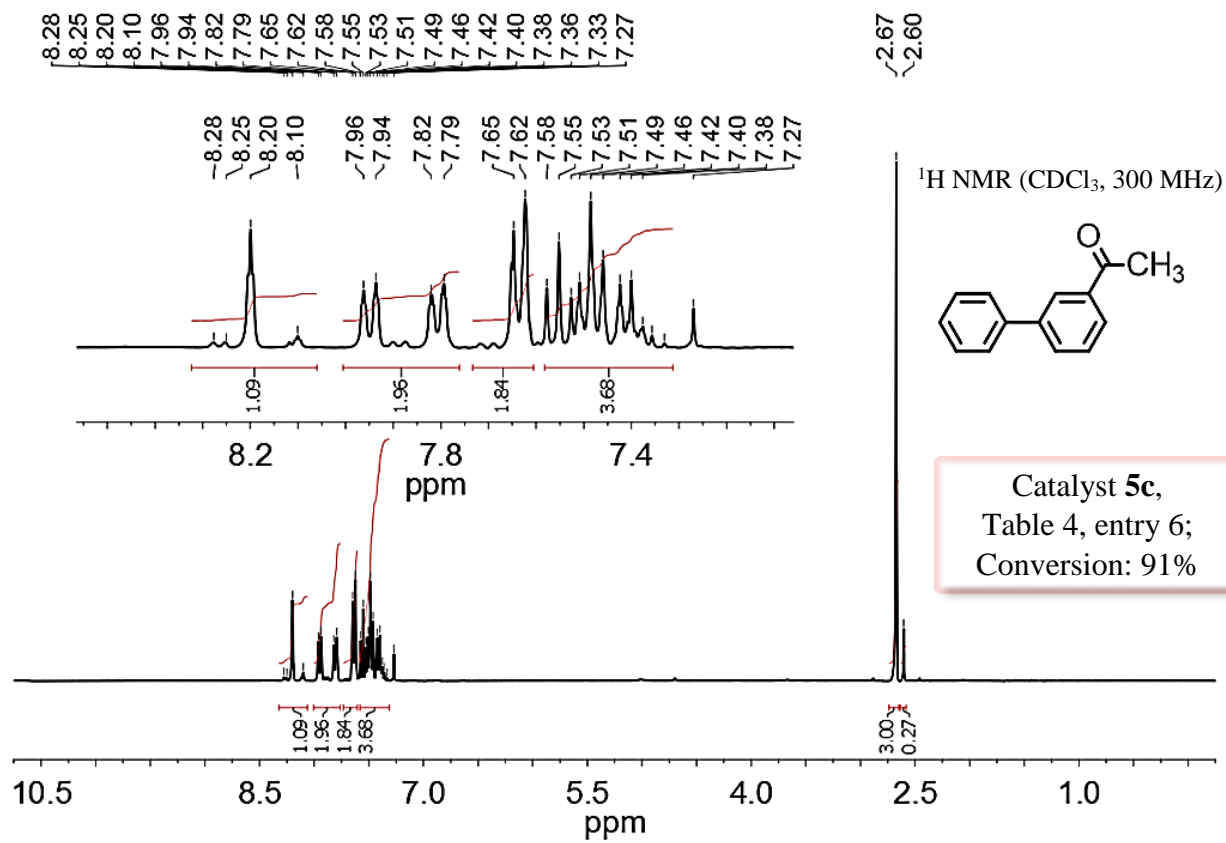

Supplement: c6ta07599a1.pdf [file c6ta07599a1.pdf]
